# Supplementary material
Source: PubMed Central journal article supplement (PMC10483380)
Supplement: jamapsychiatry-e233220-s002.pdf [file jamapsychiatry-e233220-s002.pdf]

## Data Sharing Statement

Logeswaran. Social Deprivation and Population Density Trajectories Before and After Psychotic Disorder Diagnosis. *JAMA Psychiatry*. Published September 06, 2023.  
doi:10.1001/jamapsychiatry.2023.3220

### Data

**Data available:** No
